# Supplementary material for: Evaluation and characterization of HSPA5 (GRP78) expression profiles in normal individuals and cancer patients with COVID-19
Source: PubMed Central journal article supplement (PMC7975696; doi:10.7150/ijbs.54055), 2021-02-18

## **Supplementary figures**

**Supplementary figure 1.** Homologs of the HSPA5 proteins. A. Conservation for HSPA5 in 20 different species. B. The indicated the conserved domains.

**A**

**Genes**

HSPA5, *H.sapiens*  
heat shock 70kDa protein 5 (glucose-regulated protein, 78kDa)  
HSPA5, *P.troglodytes*  
heat shock 70kDa protein 5 (glucose-regulated protein, 78kDa)  
HSPA5, *M.mulatta*  
heat shock 70kDa protein 5 (glucose-regulated protein, 78kDa)  
HSPA5, *C.lupus*  
heat shock 70kDa protein 5 (glucose-regulated protein, 78kDa)  
HSPA5, *B.taurus*  
heat shock 70kDa protein 5 (glucose-regulated protein, 78kDa)  
Hspa5, *M.musculus*  
heat shock protein 5  
Hspa5, *R.norvegicus*  
heat shock protein 5  
HSPA5, *G.gallus*  
heat shock 70kDa protein 5 (glucose-regulated protein, 78kDa)  
LOC100492570, *X.tropicalis*  
78 kDa glucose-regulated protein-like  
hspa5, *D.rerio*  
heat shock protein 5  
Hsc70-3, *D.melanogaster*  
Heat shock protein cognate 3  
AgaP\_AGAP004192, *A.gambiae*  
AgaP\_AGAP004192  
hsp-4, *C.elegans*  
hsp-4  
hsp-3, *C.elegans*  
hsp-3  
KAR2, *S.cerevisiae*  
KAR2  
KLLA0D09559g, *K.lactis*  
KLLA0D09559g  
AGOS\_ACR038W, *E.gossypii*  
AGOS\_ACR038W  
bip1, *S.pombe*  
bip1  
MGG\_02503, *M.oryzae*  
MGG\_02503  
NCU03982, *N.crassa*  
NCU03982  
BIP2, *A.thaliana*  
BIP2

**Proteins**

NP\_005338.1  
654 aa  
XP\_520257.2  
654 aa  
XP\_001099110.1  
654 aa  
XP\_863385.2  
654 aa  
NP\_001068616.1  
655 aa  
NP\_001156906.1  
655 aa  
NP\_037215.1  
654 aa  
NP\_990822.1  
652 aa  
XP\_002941690.1  
655 aa  
NP\_998223.1  
650 aa  
NP\_727564.1  
656 aa  
XP\_313085.3  
659 aa  
NP\_495536.1  
657 aa  
NP\_509019.1  
661 aa  
NP\_012500.3  
682 aa  
XP\_453488.1  
583 aa  
NP\_983441.1  
674 aa  
NP\_593245.1  
663 aa  
XP\_003709308.1  
664 aa  
XP\_956567.1  
661 aa  
NP\_851119.1  
668 aa

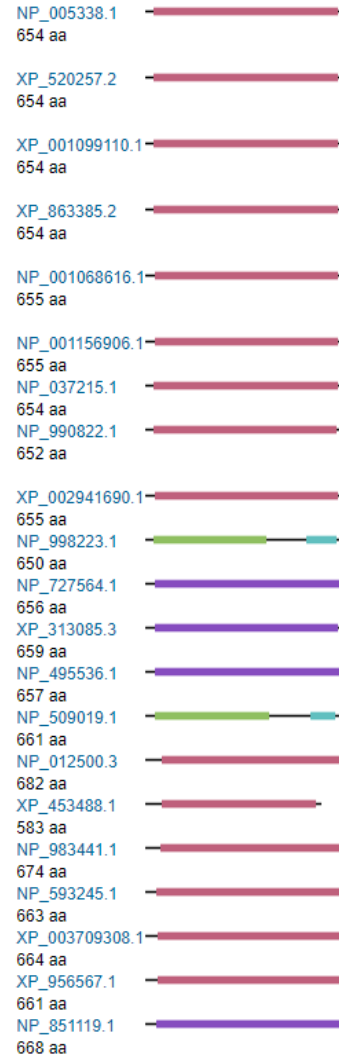

**B**

**Conserved Domains**

Conserved Domains from CDD found in prote sequences by rpsblast searching.

HSP70 (pfam00012)

■ Hsp70 protein.

PTZ00009 (PTZ00009)

■ heat shock 70 kDa protein; Provisional.

HSP70 (pfam00012)

■ Hsp70 protein.

NBD\_sugar-kinase\_HSP70\_actin (cl17037)

■ Nucleotide-Binding Domain of the sugar kinase/HSP70/actin superfamily.

ApoLp-III\_like (cl19113)

■ Apolipoprotein-III and similar insect proteins.

**Related Homology Resources**

Links to curated and computed homology information found in other databases.

MGI:95835

Orthology group for M.musculus Hspa5 includes H.sapiens HSPA5 and R.norvegicus Hspa5.

**Supplementary figure 2.** The *HSPA5* mRNA expression and comparison to *ACE2*. The *HSPA5* mRNA expression information from databases of LUNG - GTEx RNA-seq (A), and LUNG - FANTOM5 CAGE (B) in human lungs. pTPM values give a quantification of the gene abundance which is comparable between different genes and samples. C. *HSPA5* and *ACE2* mRNA levels (NX) in lungs. Consensus dataset of mRNA levels for *HSPA5* and *ACE2* are derived from HPA dataset, GTEx dataset, and FANTOM5 dataset. The RNA-sequencing results generated in the HPA are reported as normalized NX values. In the HPA, a NX value of 1.0 is defined as a threshold for expression of the corresponding protein. pTPM, transcripts per million. NX, normalized expression.

**A**

LUNG - GTEx RNA-seq

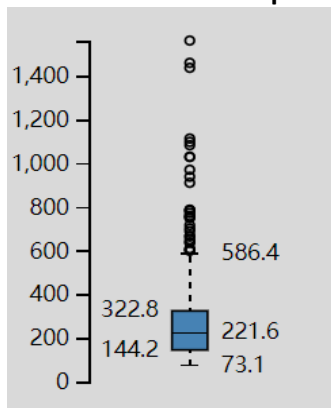

| Lung                 |              |
|----------------------|--------------|
| <b>Average pTPM:</b> | <b>275.1</b> |
| Samples:             | 427          |
| Max pTPM:            | 1560.6       |
| Min pTPM:            | 73.1         |
| Std pTPM:            | 205.9        |
| Median pTPM:         | 221.6        |

**C**

HSPA5 and ACE2 mRNA levels (NX)

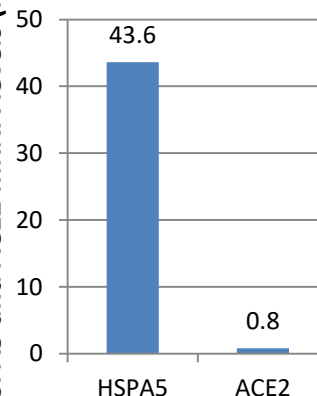

**B**

LUNG - FANTOM5 CAGE<sup>i</sup>

Max Scaled Tags Per Million 449.0

|                                       | FANTOM5 sample id | Sample description    | Scaled Tags Per Million |
|---------------------------------------|-------------------|-----------------------|-------------------------|
| Lung                                  | FF:10019-101D1    | 46,65,94 years, mixed | 578.7                   |
| <b>Scaled Tags Per Million: 578.7</b> |                   |                       |                         |
| Lung - right lower lobe               | FF:10075-102A3    | 29 years, male        | 319.3                   |
| <b>Scaled Tags Per Million: 319.3</b> |                   |                       |                         |

**Supplementary figure 3.** Localization of HSPA5 protein in malignant tumors and cancer cell lines. A~E. The representative IHC images of tumors from cancers of colorectal, breast, prostate, lung, and liver, respectively. The images by antibody staining in 20 different tumors is summarized but not showed all. The protein expressions for HSPA5 from malignant tumors were obtained in the database of the Human Protein Atlas (HPA) (<https://www.proteinatlas.org/ENSG00000044574-HSPA5/pathology>) F~I. The representative IF staining of epidermoid carcinoma cell line A-431, derived from an 85-year-old female, with HSPA5 antibody (cat #: HPA038845, Sigma-Aldrich) for HSPA5 staining (F), nucleus staining (G), microtubules staining (H), and all merged together (I). The images of human cells give overviews about the subcellular location of HSPA5 protein from immunofluorescence microscopy (<https://www.proteinatlas.org/ENSG00000044574-HSPA5/cell#human>). The representative immunofluorescent images are displayed. Three different organelle probes with different channels are displayed in the multiple color images - nucleus stained in blue, microtubules in red, and an antibody staining targeting the protein of HSPA5 in green.

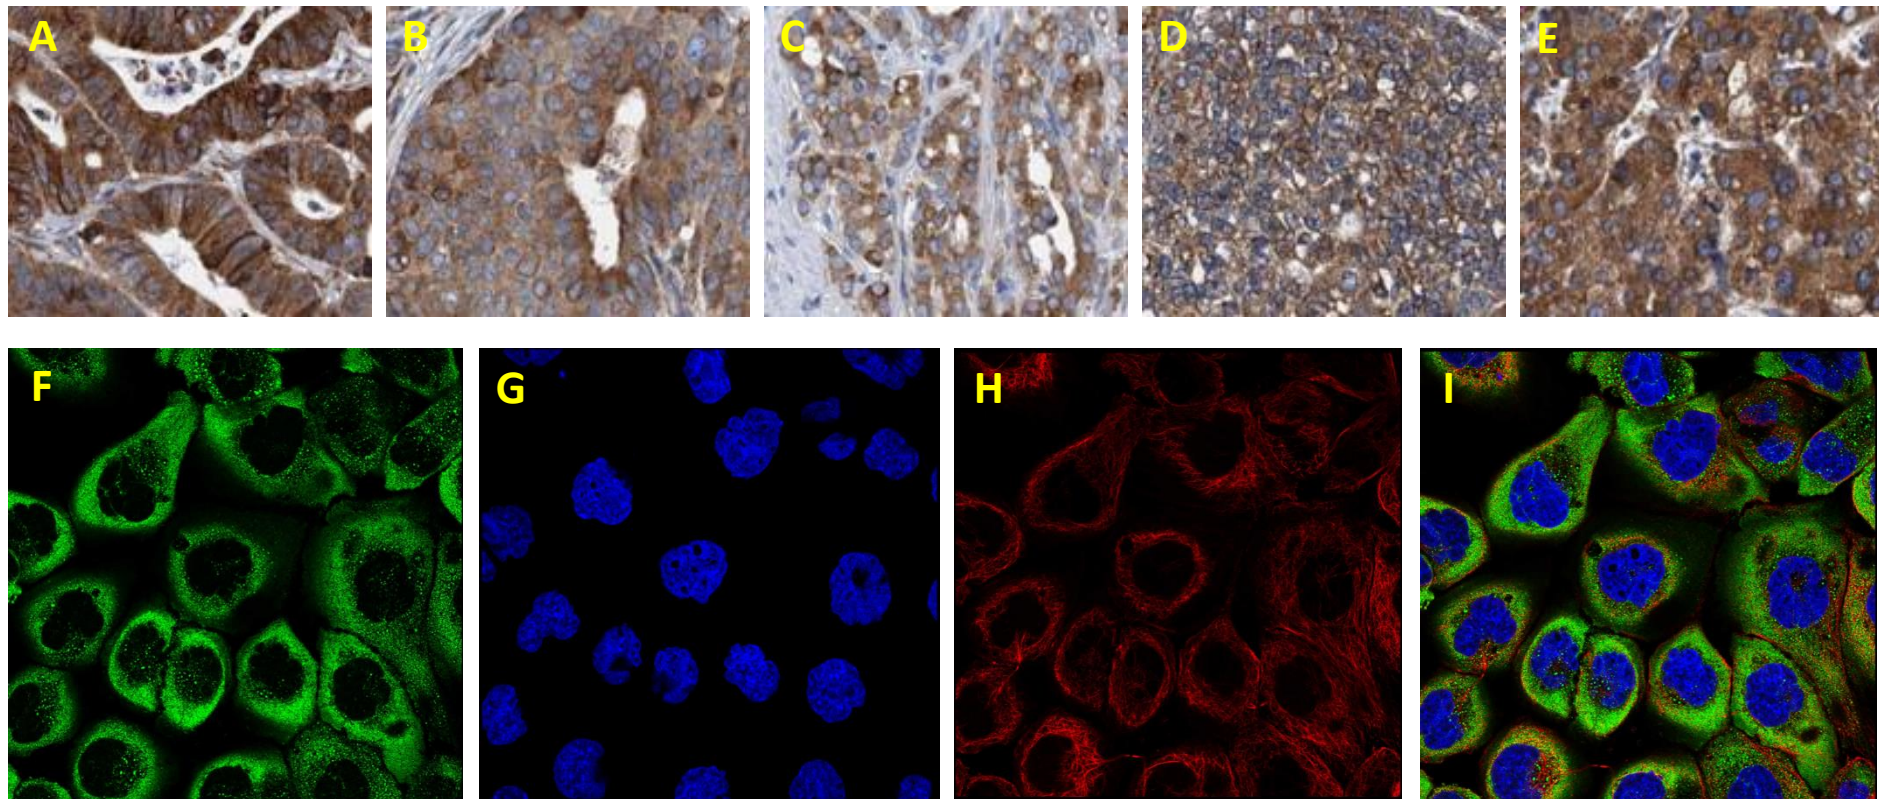

Supplement: ijbsv17p0897s1.pdf [file ijbsv17p0897s1.pdf]
